# Supplementary material for: A two-step method for variable selection in the analysis of a case-cohort study
Source: PubMed Central journal article supplement (PMC5913627; doi:10.1093/ije/dyx224), 2017-11-10
Supplement: dyx224_ije-2017-02-0160-file004.pdf [file dyx224_ije-2017-02-0160-file004.pdf]

Supplementary Table 1. Sensitivity of variable selection methods, for each scenario, at the false discovery rate of stepwise selection using a 0.1  $P$  value inclusion threshold.

| Method                                | Pairwise correlation between all variables |             |             |
|---------------------------------------|--------------------------------------------|-------------|-------------|
|                                       | 0.2                                        | 0.5         | 0.8         |
| <b>5 signals among 20 variables</b>   |                                            |             |             |
| One-at-a-time*                        | 0.77 (0.01)                                | 0.48 (0.01) | 0.45 (0.01) |
| Stepwise                              | 0.80 (0.01)                                | 0.77 (0.01) | 0.67 (0.01) |
| 2-Step BVS*                           | 0.89 (0.01)                                | 0.85 (0.01) | 0.75 (0.01) |
| <b>5 signals among 100 variables</b>  |                                            |             |             |
| One-at-a-time*                        | 0.71 (0.01)                                | 0.44 (0.01) | 0.41 (0.01) |
| Stepwise                              | 0.81 (0.01)                                | 0.76 (0.01) | 0.64 (0.01) |
| 2-Step BVS*                           | 0.84 (0.01)                                | 0.79 (0.01) | 0.68 (0.01) |
| <b>5 signals among 1000 variables</b> |                                            |             |             |
| One-at-a-time*                        | 0.65 (0.01)                                | 0.42 (0.00) | 0.39 (0.01) |
| Stepwise                              | 0.79 (0.01)                                | 0.74 (0.01) | 0.63 (0.01) |
| 2-Step BVS*                           | 0.81 (0.01)                                | 0.76 (0.01) | 0.66 (0.01) |

Mean sensitivity, the proportion of true signals selected, is displayed for 200 simulations with the corresponding Monte Carlo errors in brackets. \*Selection thresholds chosen to match the false discovery rate of the stepwise method in each simulation, for which a nominal  $P$  value inclusion threshold of 0.1 was used.

Supplementary Table 2. False discovery rates of variable selection methods, for each scenario, at the sensitivity of stepwise selection using a 0.1  $P$  value inclusion threshold.

| Method                                 | Pairwise correlation between all variables |               |               |
|----------------------------------------|--------------------------------------------|---------------|---------------|
|                                        | 0.2                                        | 0.5           | 0.8           |
| <b>5 signals among 20 variables</b>    |                                            |               |               |
| One-at-a-time*                         | 0.14 (0.01)                                | 0.68 (0.02)   | 0.54 (0.02)   |
| Stepwise                               | 0.01 (<0.01)                               | 0.02 (<0.01)  | 0.04 (0.01)   |
| 2-Step BVS*                            | <0.01 (<0.01)                              | <0.01 (<0.01) | <0.01 (<0.01) |
| <b>5 signals among 100 variables</b>   |                                            |               |               |
| One-at-a-time*                         | 0.34 (0.02)                                | 0.86 (0.02)   | 0.77 (0.02)   |
| Stepwise                               | 0.05 (0.01)                                | 0.10 (0.01)   | 0.21 (0.01)   |
| 2-Step BVS*                            | <0.01 (<0.01)                              | 0.01 (<0.01)  | 0.03 (0.01)   |
| <b>5 signals among 1,000 variables</b> |                                            |               |               |
| One-at-a-time*                         | 0.61 (0.03)                                | 0.96 (0.01)   | 0.91 (0.01)   |
| Stepwise                               | 0.29 (0.01)                                | 0.44 (0.01)   | 0.64 (0.01)   |
| 2-Step BVS*                            | 0.02 (0.01)                                | 0.05 (0.01)   | 0.19 (0.02)   |

Mean false discovery rate, the proportion of noise variables selected, is displayed for 200 simulations with the corresponding Monte Carlo errors in brackets. \*Selection thresholds chosen to match the sensitivity of the stepwise method in each simulation, for which a nominal  $P$  value inclusion threshold of 0.1 was used.

Supplementary Figure 1. Correlations between fatty acids in the EPIC-InterAct case-cohort study. Correlations are calculated using data from the subcohort.



Pairwise Pearson  $r^2$  are displayed.
